# Supplementary material
Source: publisher figshare collection journal article supplement (https://tandf.figshare.com/articles/dataset/_/19794296)

# 郑州大学附属肿瘤医院伦理委员会

## Affiliated Cancer Hospital of Zhengzhou University Institutional Review Board

批准编号 (Approval No.) 2020-031-001

|                                                                                                                                                                                                                                                                                                                                                                                                                                                                                                                                                    |                                                                                                               |                                 |            |
|----------------------------------------------------------------------------------------------------------------------------------------------------------------------------------------------------------------------------------------------------------------------------------------------------------------------------------------------------------------------------------------------------------------------------------------------------------------------------------------------------------------------------------------------------|---------------------------------------------------------------------------------------------------------------|---------------------------------|------------|
| 实验名称<br>Experiment title                                                                                                                                                                                                                                                                                                                                                                                                                                                                                                                           | 转录因子 TCF3 通过促进组蛋白修饰酶 SIRT1 的表达调控 Wnt/ $\beta$ -catenin 影响宫颈癌进展                                                |                                 |            |
| 申请人<br>Applicant                                                                                                                                                                                                                                                                                                                                                                                                                                                                                                                                   | 于晓                                                                                                            | 申请人学历<br>Education of applicant | 医学硕士       |
| 技术职称<br>Professional title                                                                                                                                                                                                                                                                                                                                                                                                                                                                                                                         | 主治医师                                                                                                          | 申请人所在单位<br>Name of organization | 郑州大学附属肿瘤医院 |
| 拟进动物品种品系<br>Species of strain                                                                                                                                                                                                                                                                                                                                                                                                                                                                                                                      | BALB/c 裸体雌性小鼠                                                                                                 | 拟进动物数量<br>Number                | 30 只       |
| 审查用途<br>Inspection for                                                                                                                                                                                                                                                                                                                                                                                                                                                                                                                             | <input checked="" type="checkbox"/> 申报项目 <input checked="" type="checkbox"/> 发表论文 <input type="checkbox"/> 其他 |                                 |            |
| <p>实验要点, 包括实验目的、实验方法、观测指标、实验结束后处死动物的方法等(Aim of experiment , Outline of experiments, experimental methods, observational index, executing animal method, et al)</p> <p>本项目涉及实验动物和动物实验都遵守国家实验动物管理的法律、法规、技术标准及相关规定。<b>实验目的:</b> 探究 TCF3 在宫颈癌中的作用以及分子机制。<b>实验方法和观测指标:</b> 将 30 只小鼠饲养在恒温(22-25℃)和恒湿(40%-50%)的环境中, 将宫颈癌细胞 (<math>1 \times 10^6</math>)皮下接种到每只雌性小鼠的右侧, 为了评估肿瘤体积每周测量一次肿瘤大小, 并使用标准公式计算肿瘤体积: 长<math>\times</math>宽<math>^2/2</math>, 在实验结束时分离异种移植肿瘤并称重, 来自异种移植肿瘤的组织被石蜡包埋用于组织学分析, 实验重复三次。<b>处死动物方法:</b> 实验结束后, 对小鼠注射 150mg/kg 戊巴比妥钠进行安乐死。</p> |                                                                                                               |                                 |            |
| <p>实验动物伦理委员会意见 (Attitude of the Animal Care &amp; Welfare Committee)</p> <p>经初步审核, 该项目的动物实验方案符合动物保护、动物福利和伦理原则, 符合国家实验动物福利伦理的相关规定。</p>                                                                                                                                                                                                                                                                                                                                                                                                              |                                                                                                               |                                 |            |

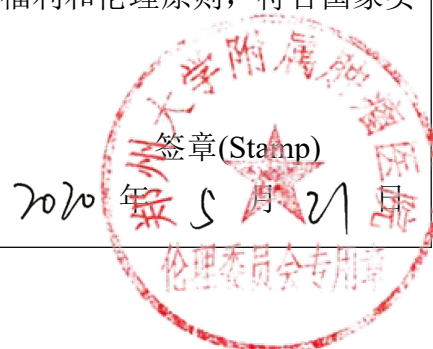

Supplement: Supplementary file 4 [file 1]
