# Supplementary material
Source: publisher figshare collection journal article supplement (https://tandf.figshare.com/articles/dataset/_/19794296)

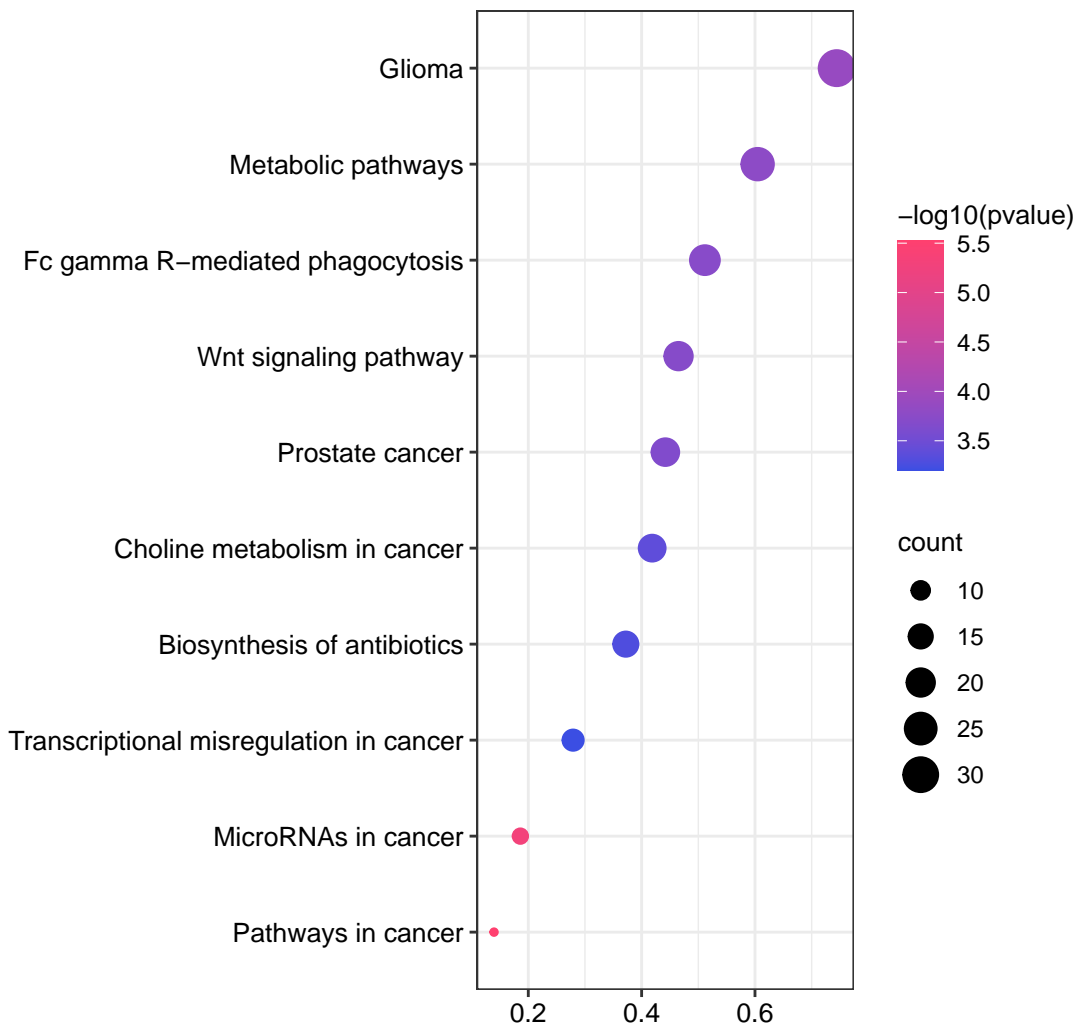

Supplement: Supplementary file 1 [file 1]

# Gene expression correlation between TCF3 and SIRT1 in CESC

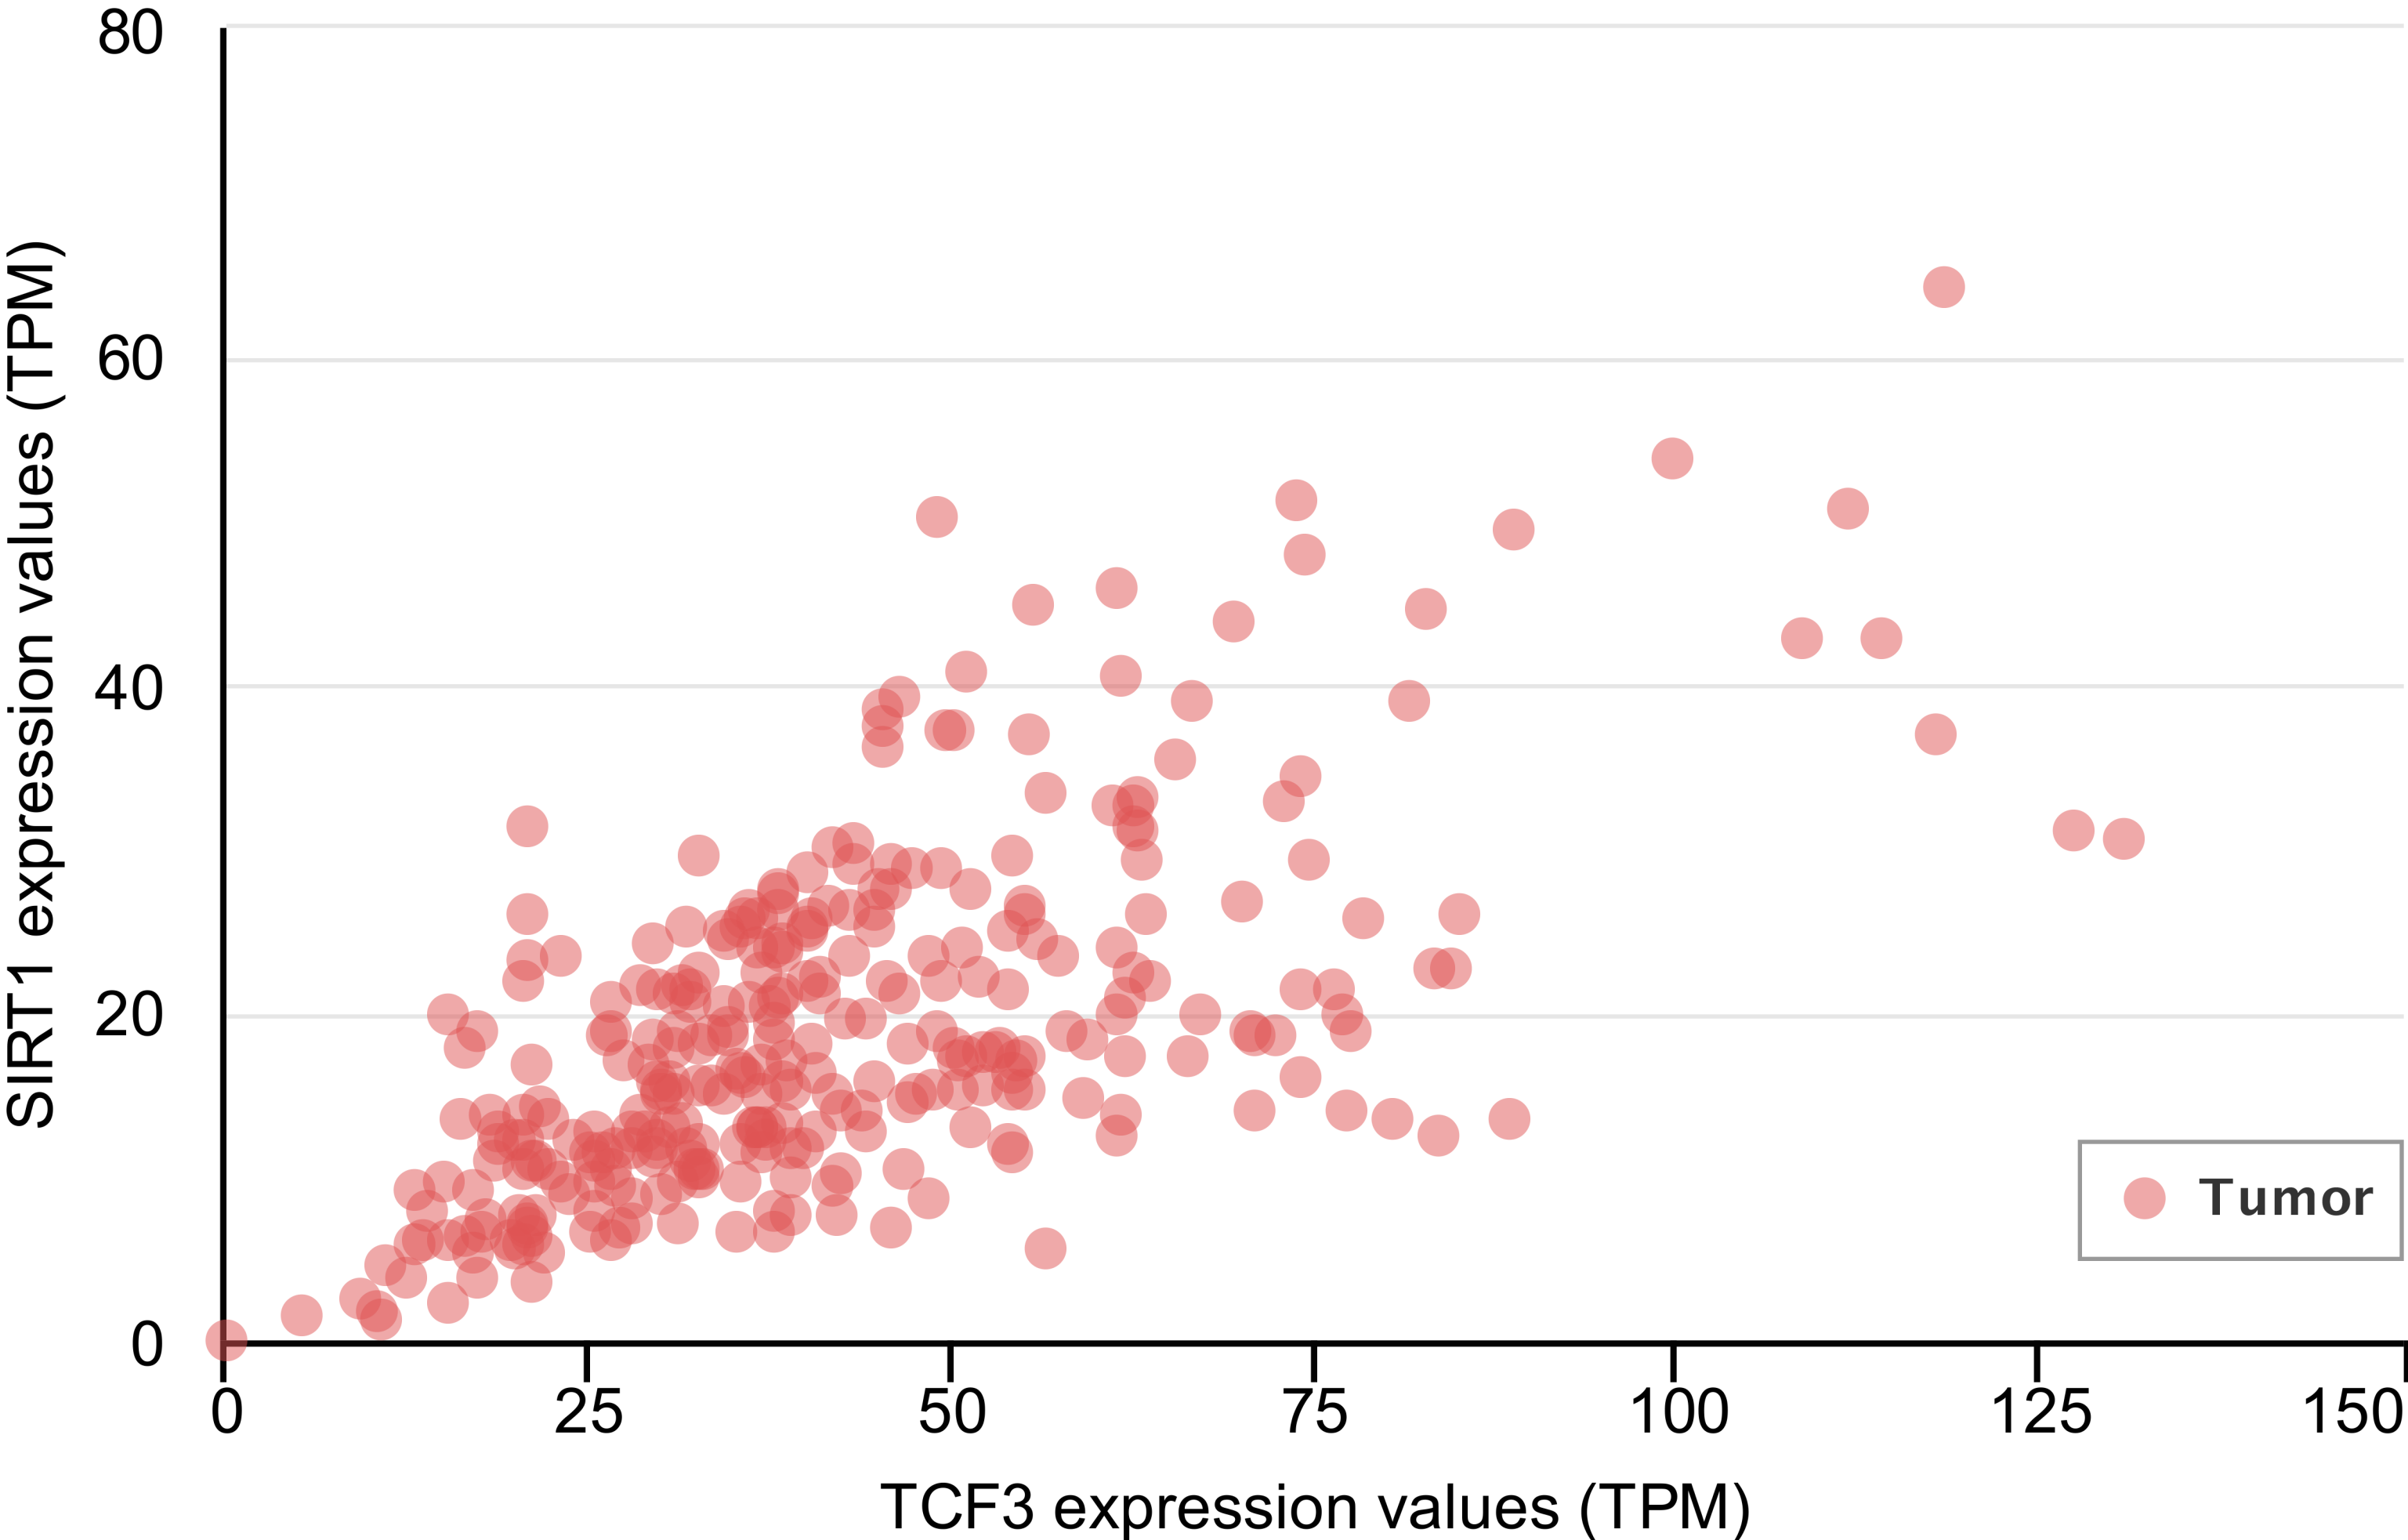

Supplement: Supplementary file 2 [file 1]

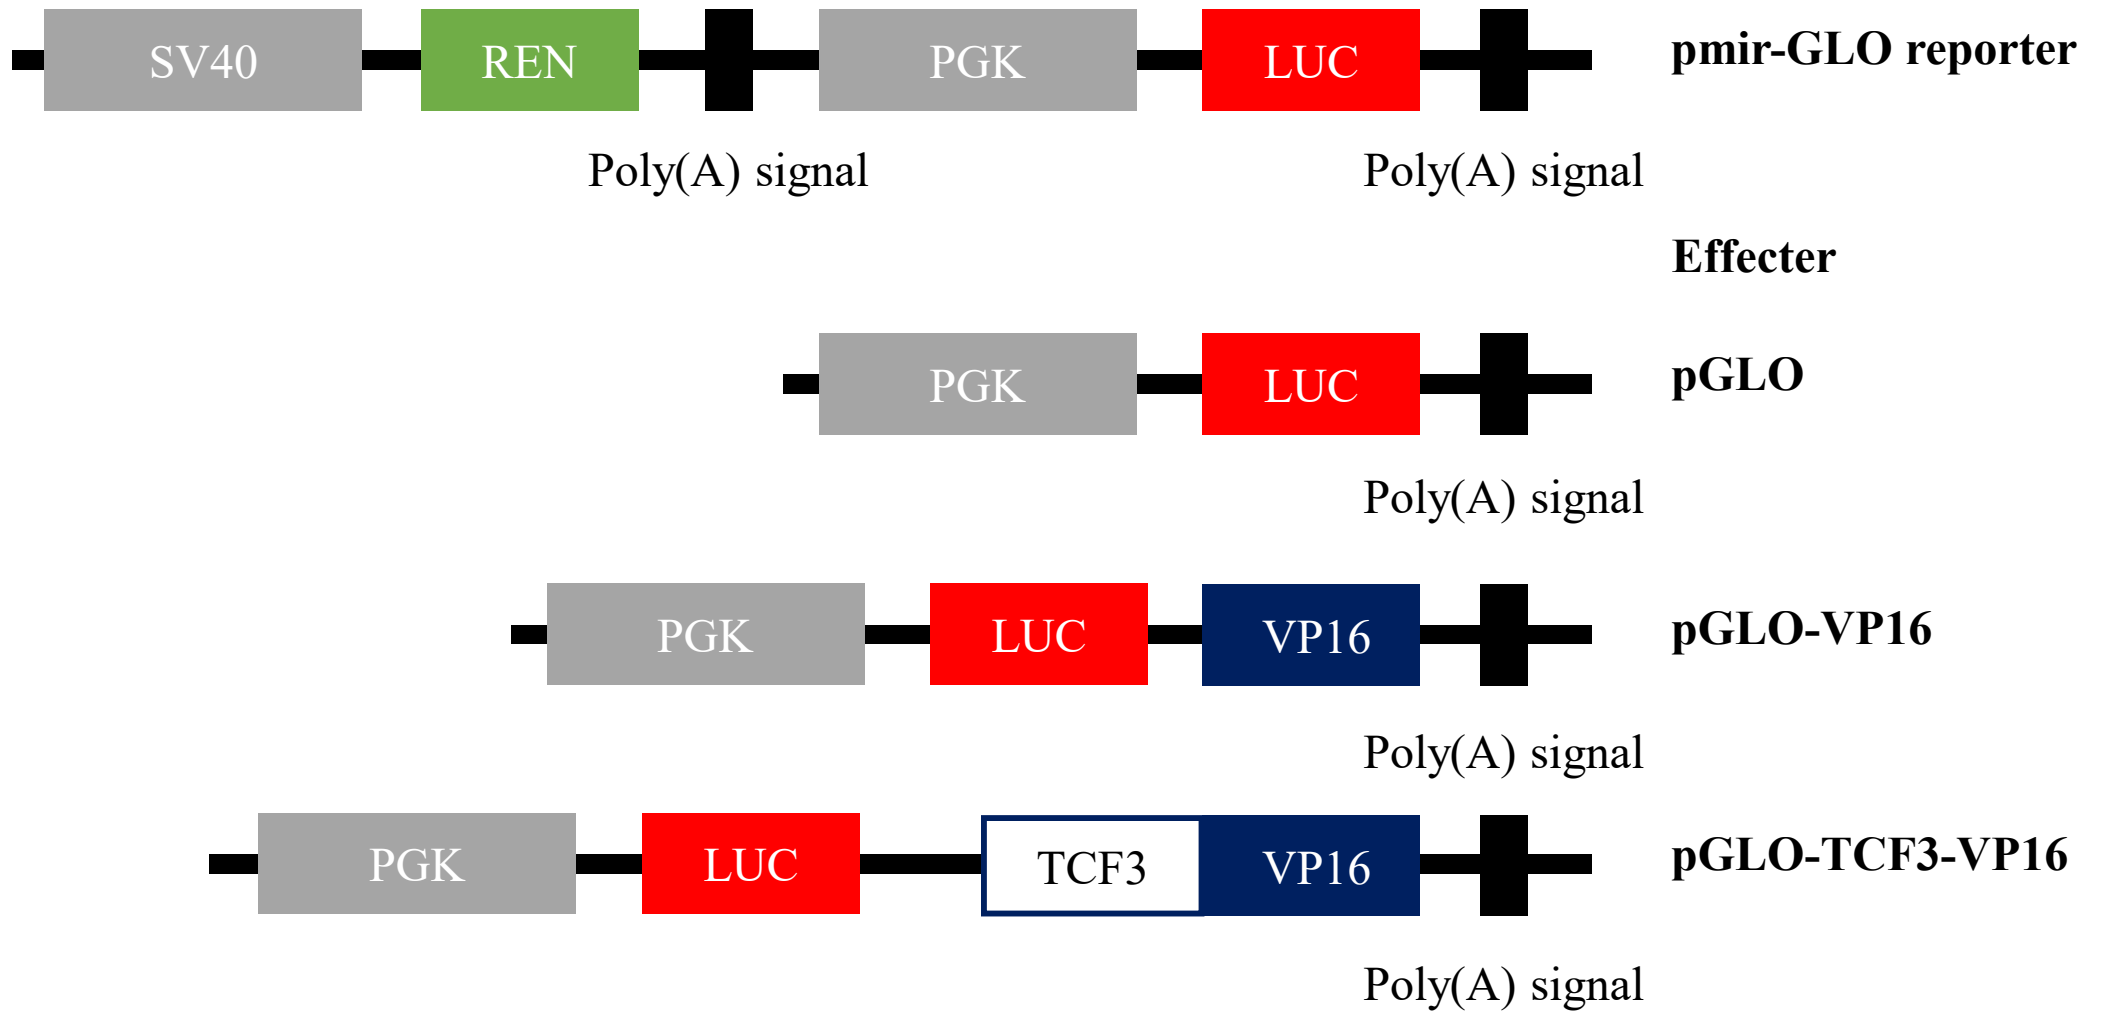

Supplement: Supplementary file 3 [file 1]

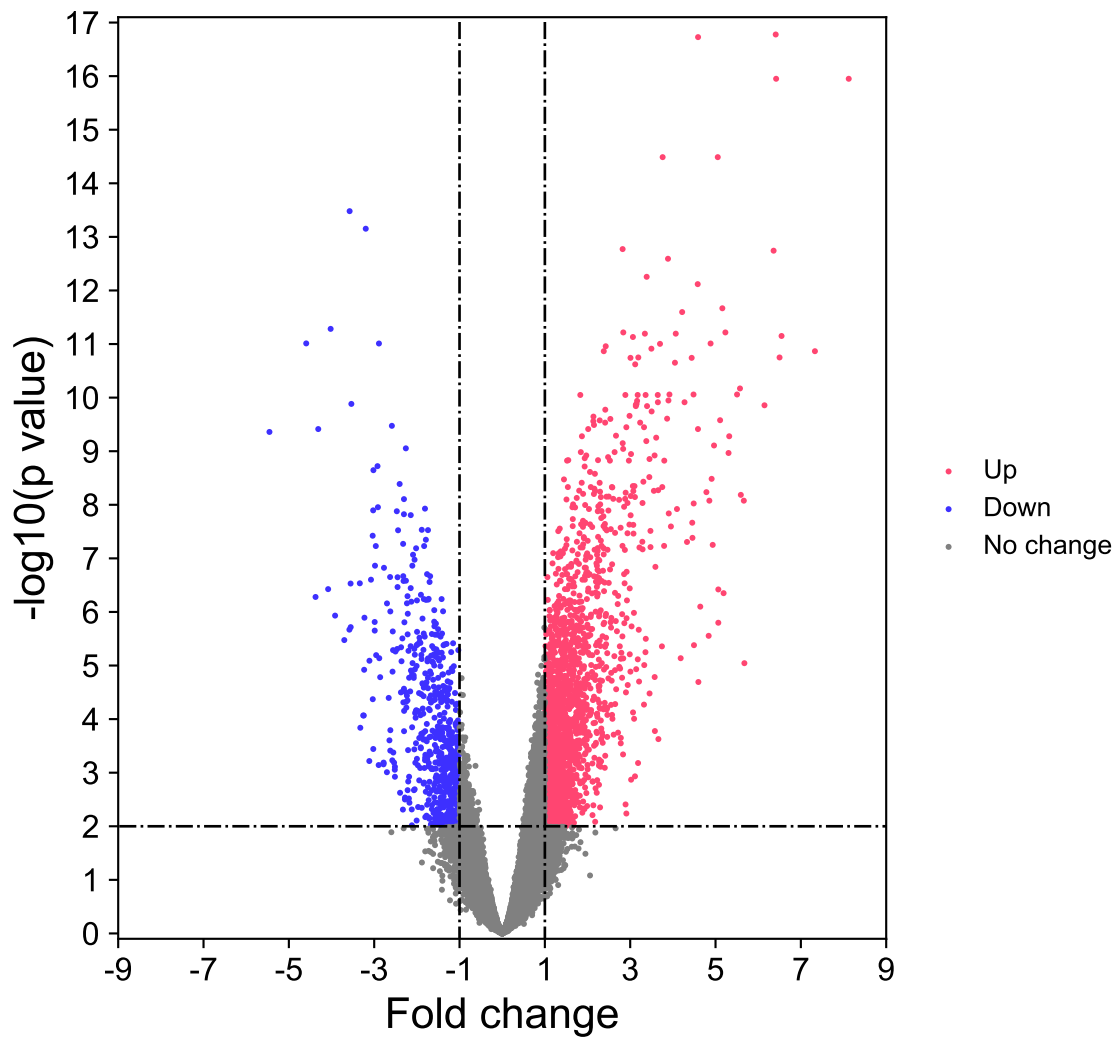

Supplement: Supplementary file 5 [file 1]

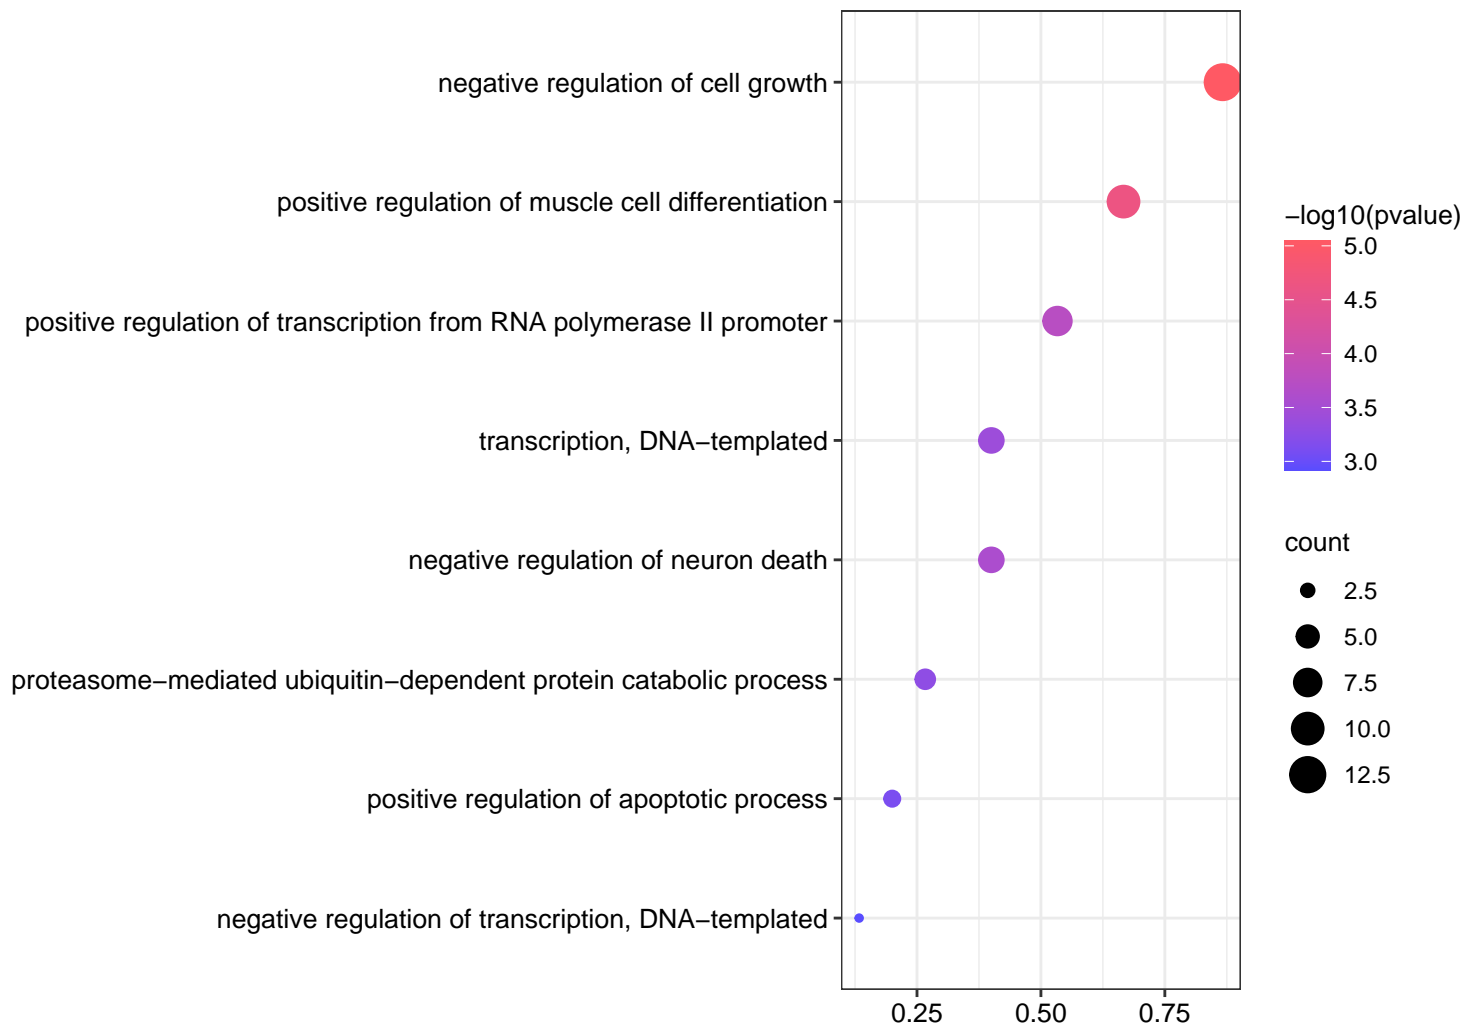

Supplement: Supplementary file 6 [file 1]

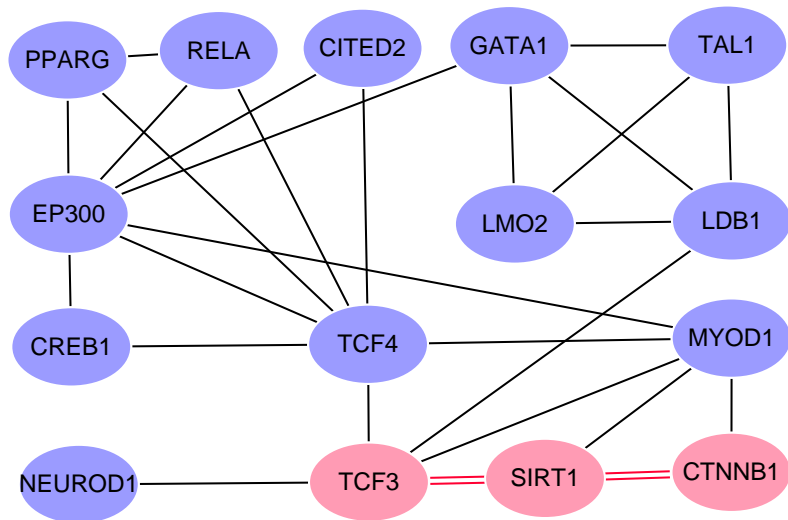

Supplement: Supplementary file 7 [file 1]

# Expression of TCF3 in CESC based on Sample types

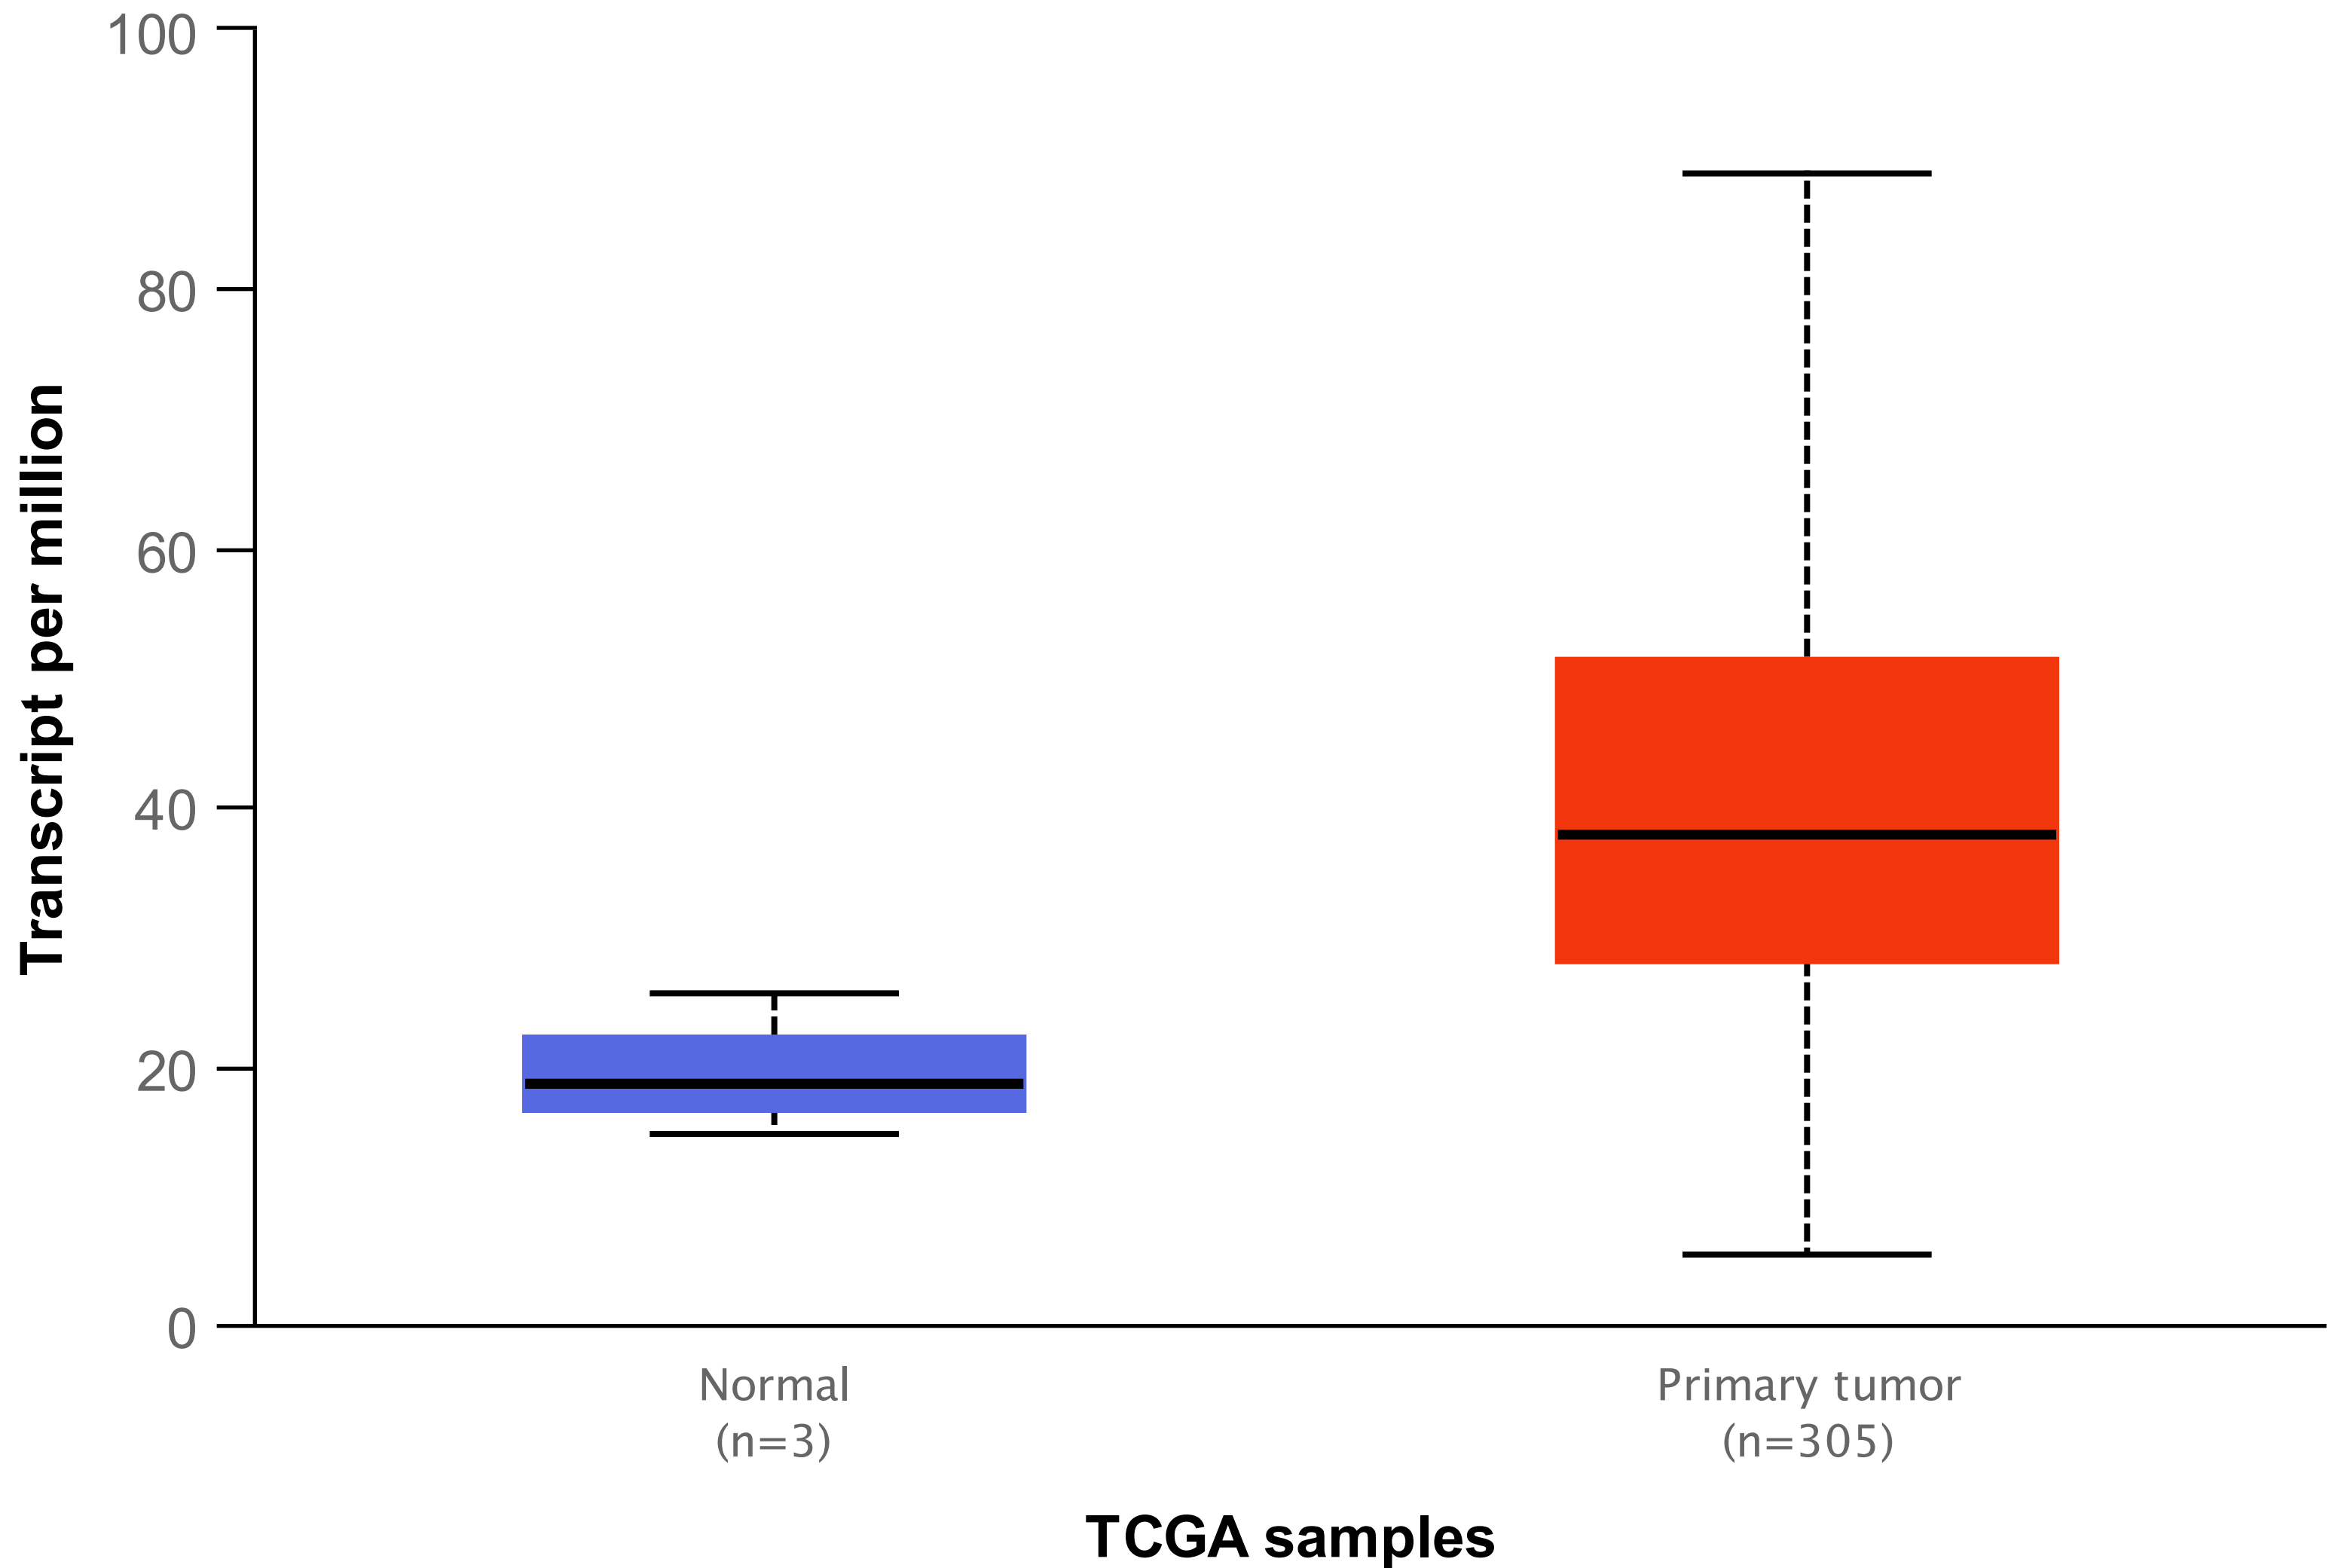

Supplement: Supplementary file 8 [file 1]

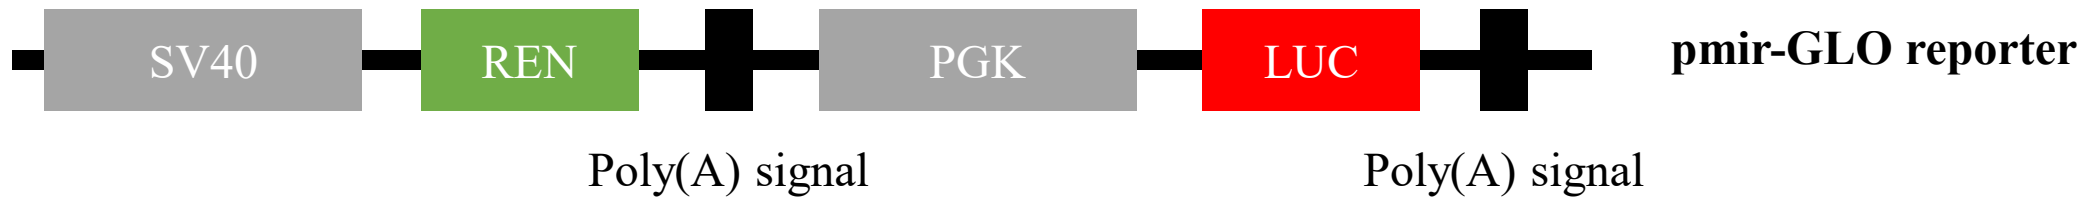

**Effector**

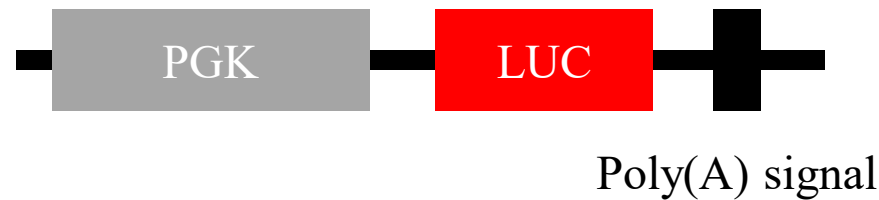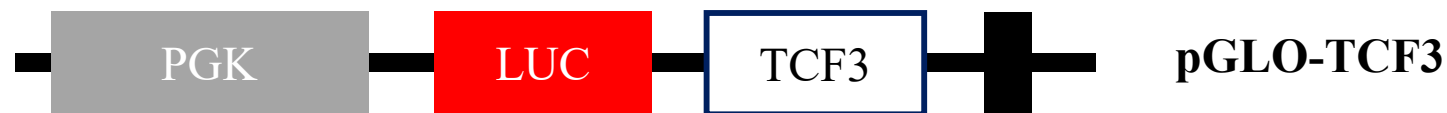

Supplement: Supplementary file 9 [file 1]

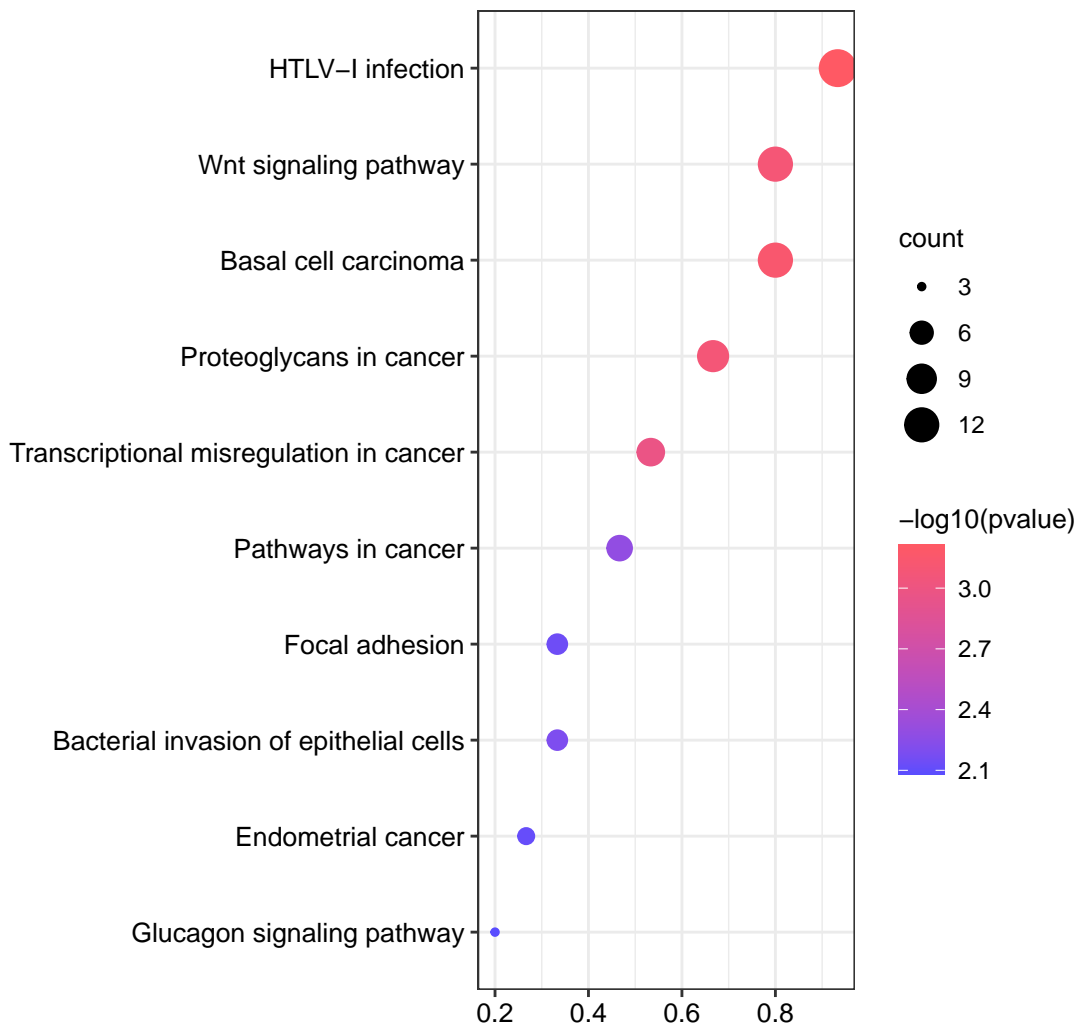

Supplement: Supplementary file 10 [file 1]

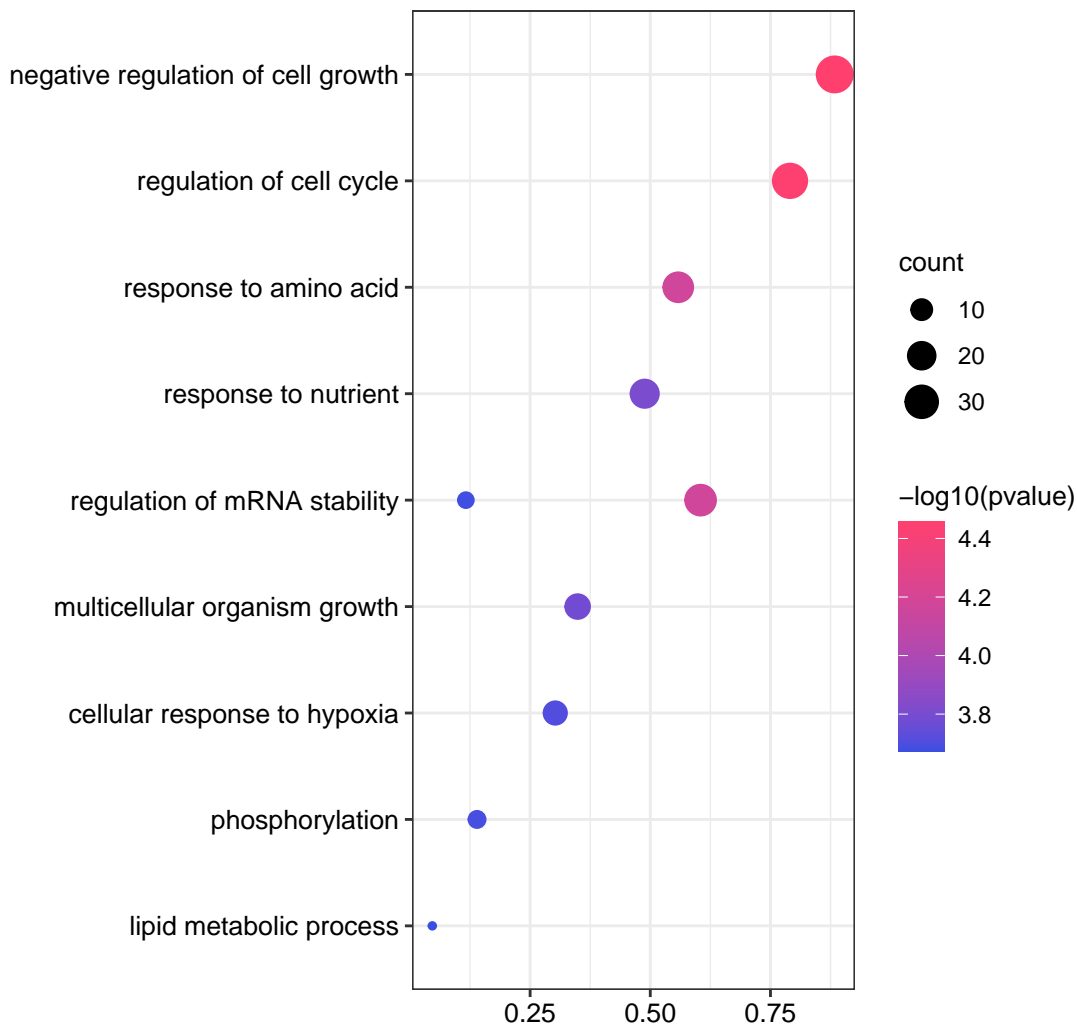

Supplement: Supplementary file 11 [file 1]

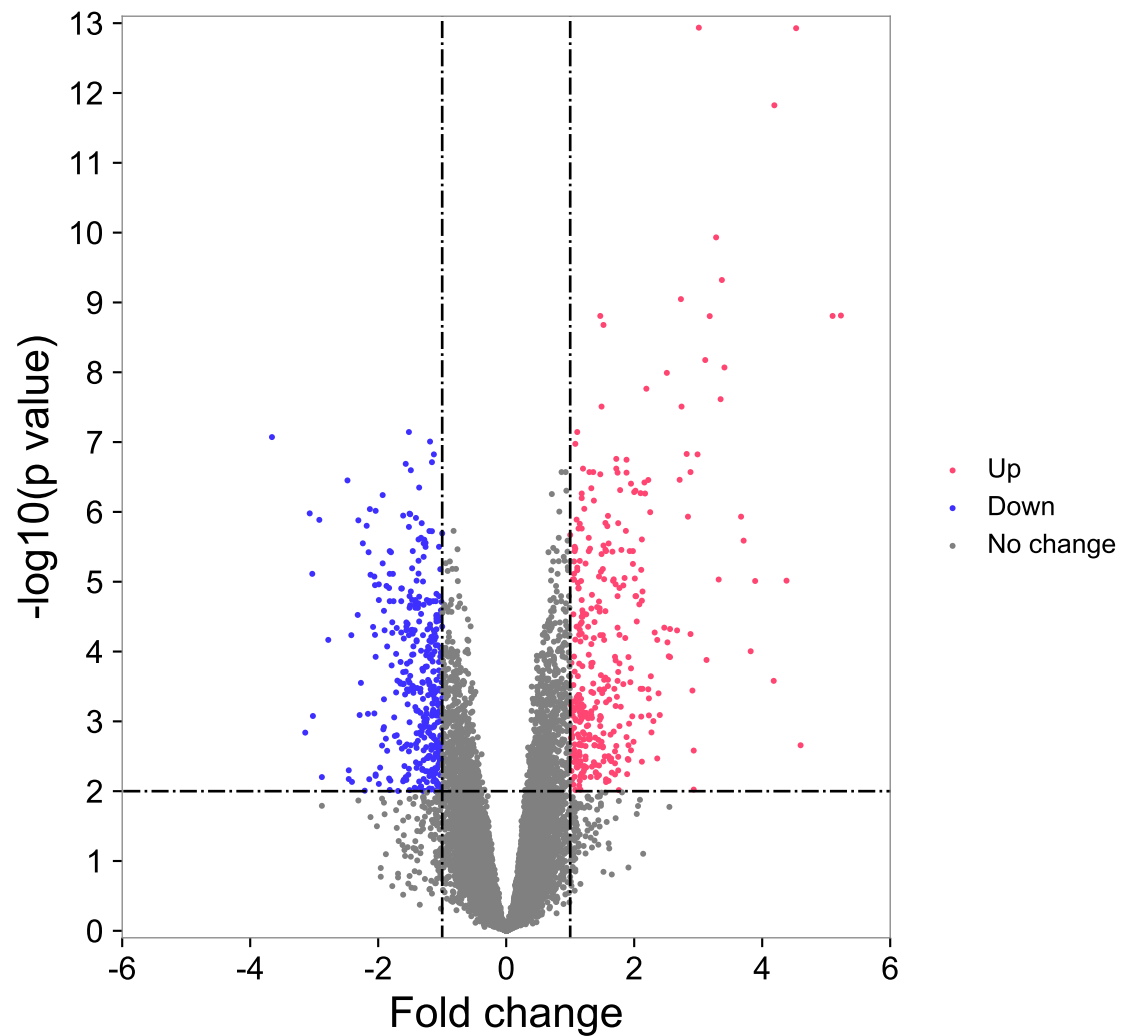

Supplement: Supplementary file 12 [file 1]

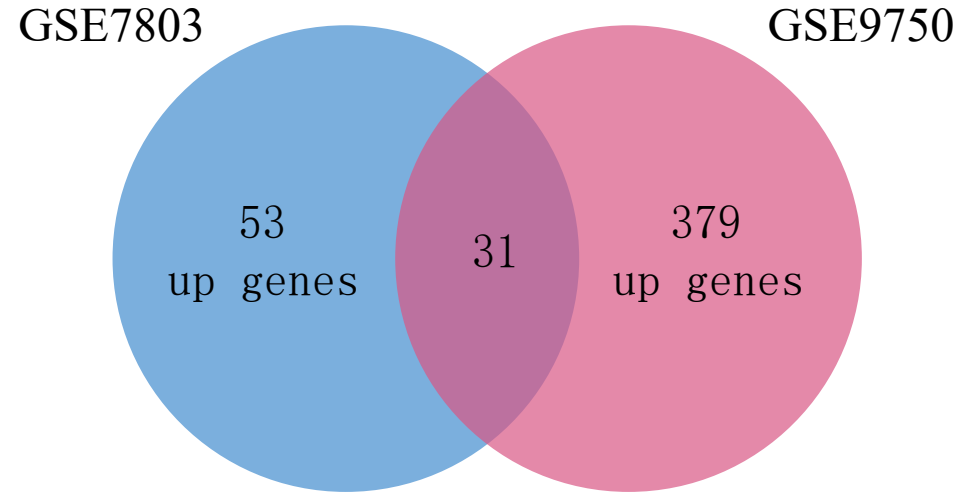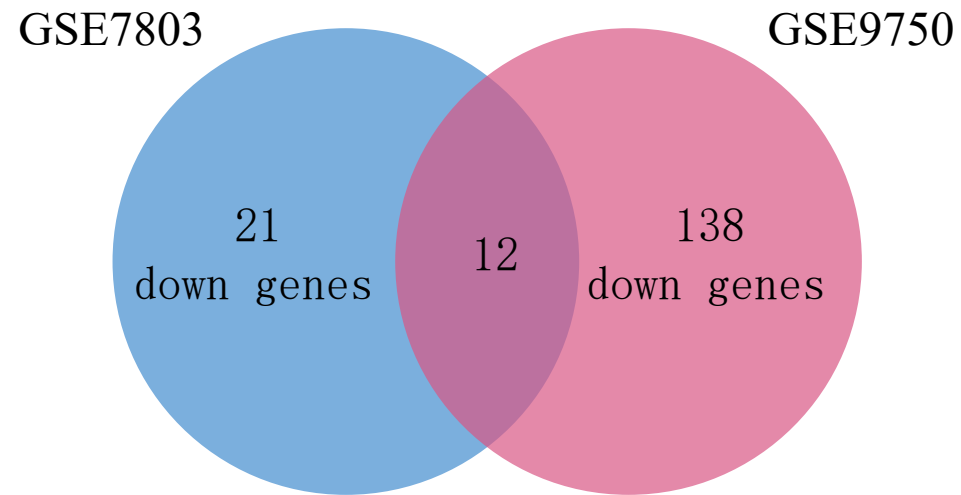

Supplement: Supplementary file 13 [file 1]

# Expression of SIRT1 in CESC based on Sample types

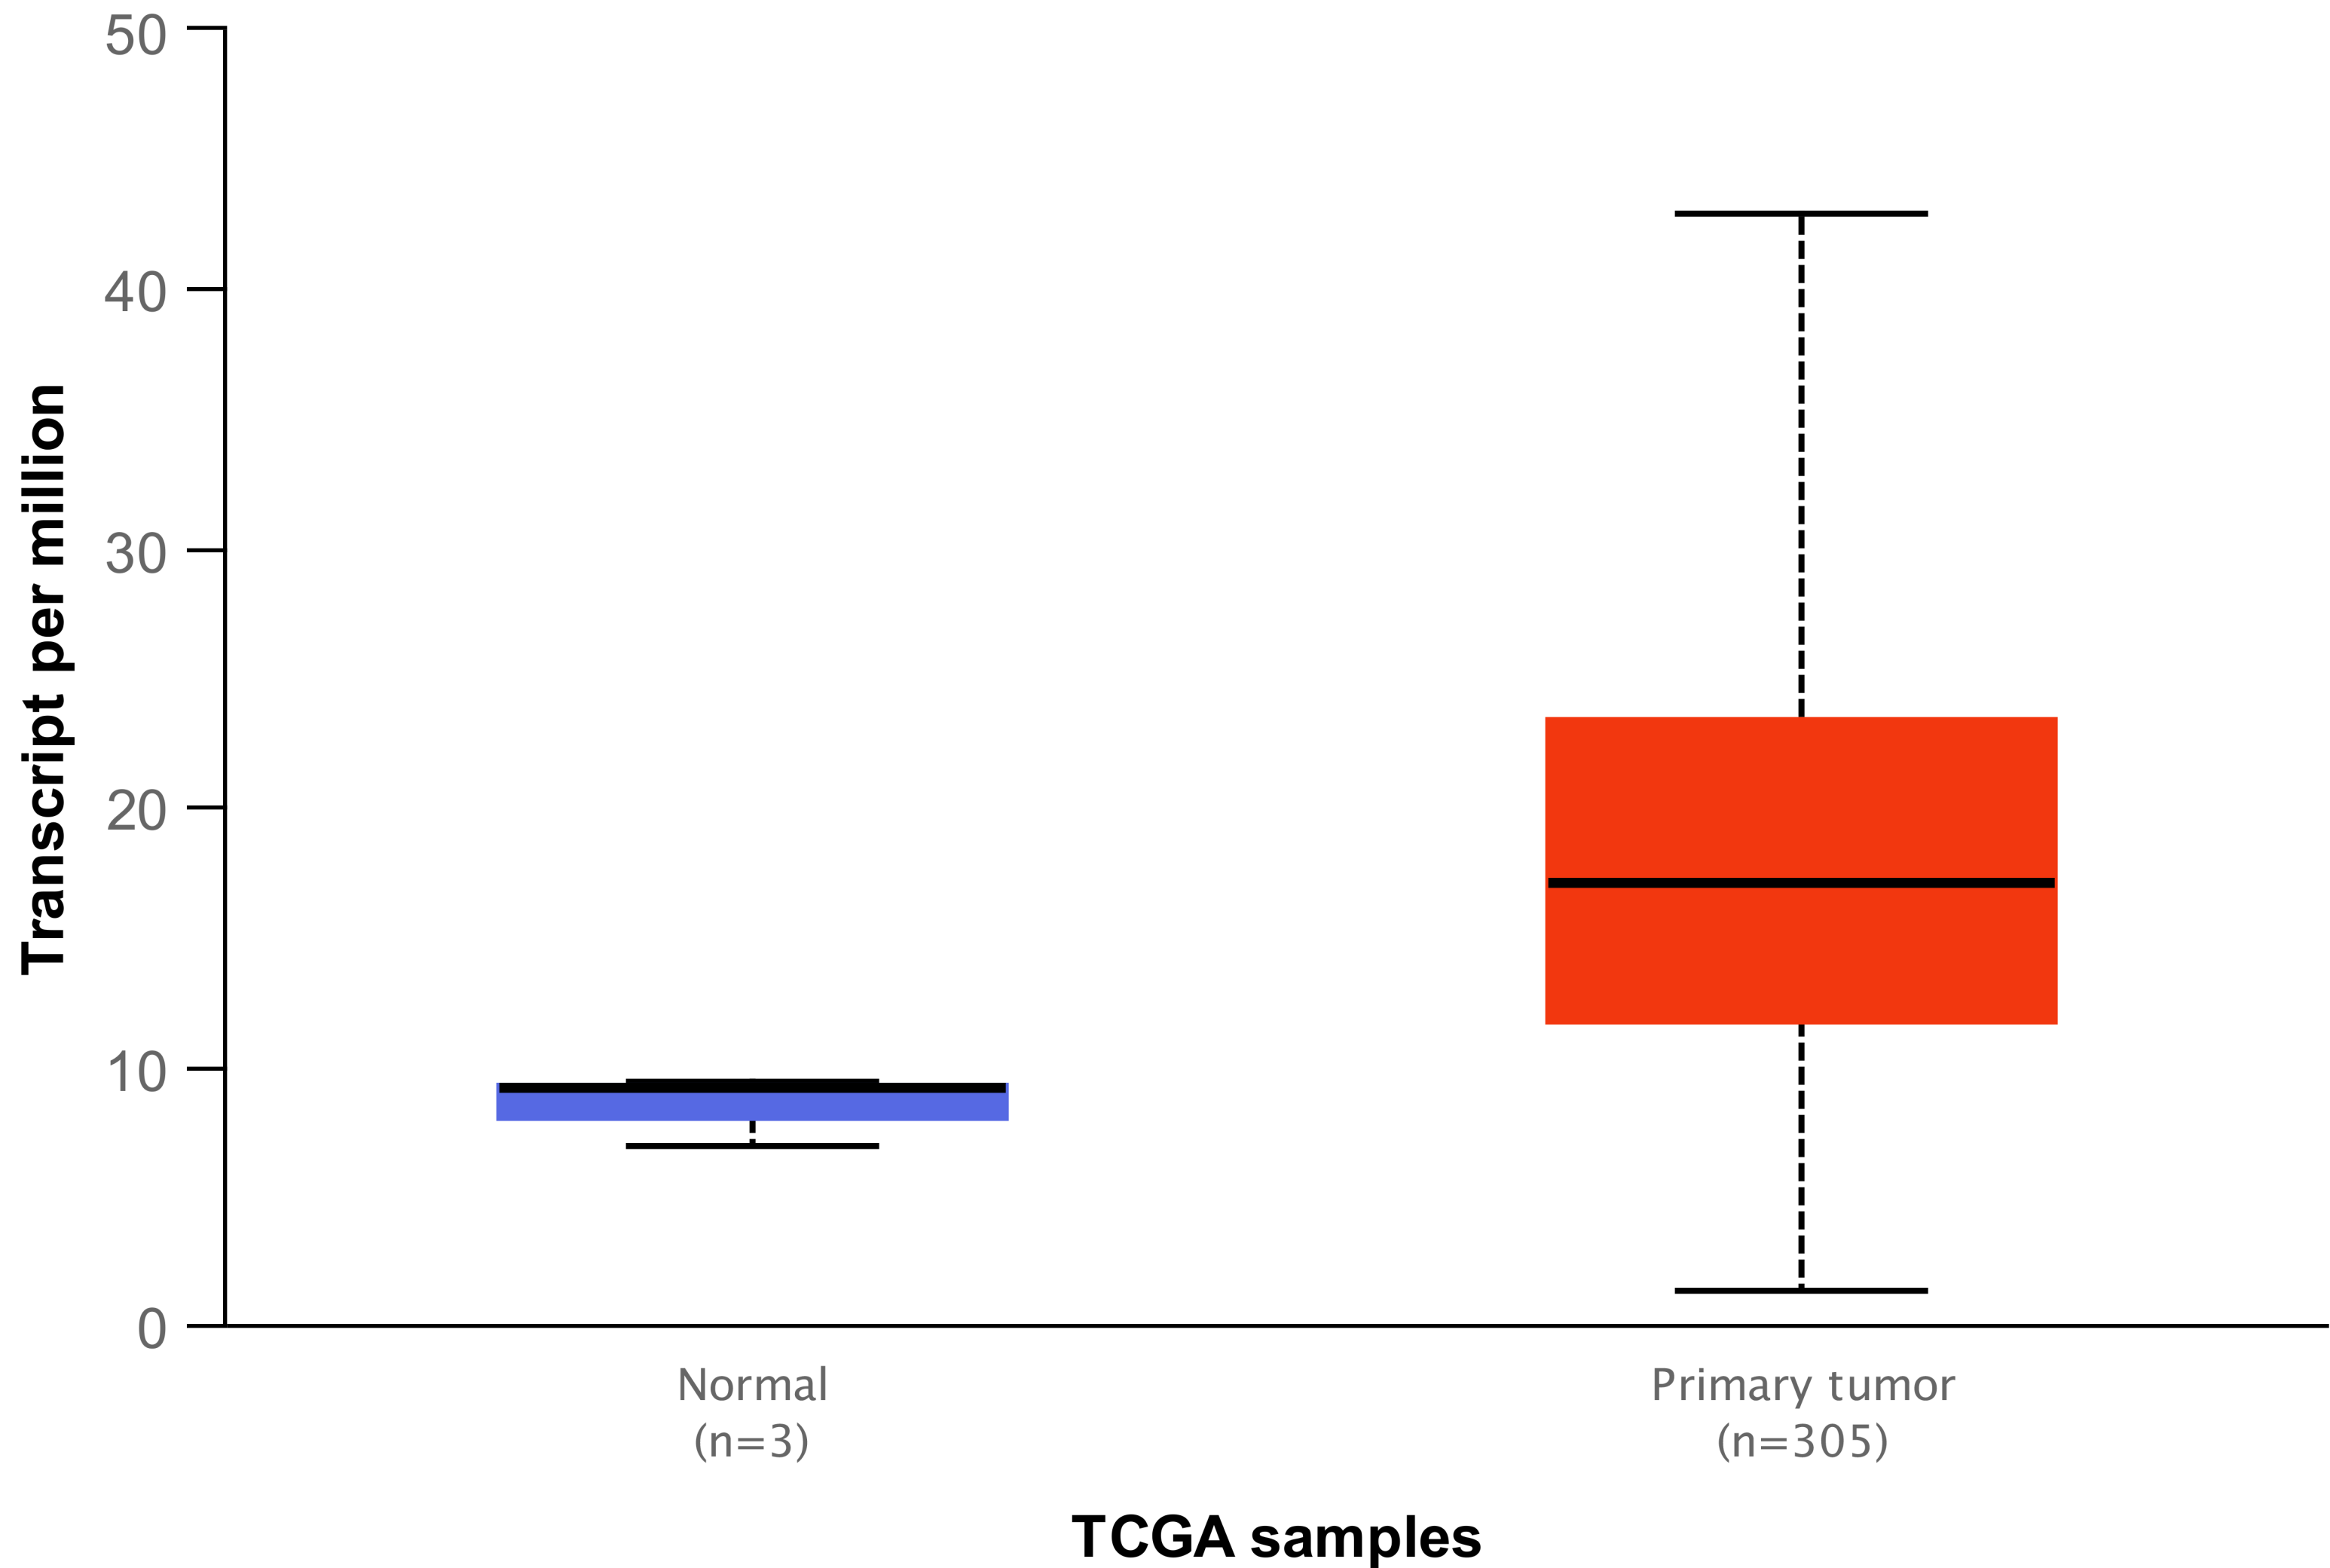

Supplement: Supplementary file 14 [file 1]
